# Supplementary figures and images for: Effect of delayed‐release dimethyl fumarate on no evidence of disease activity in relapsing–remitting multiple sclerosis: integrated analysis of the phase III DEFINE and CONFIRM studies
Source: PubMed Central journal article supplement — Eur J Neurol. 2017 Mar 22;24(5):726–33. doi: 10.1111/ene.13272 (PMC5413827; doi:10.1111/ene.13272), 2017-03-22

**A**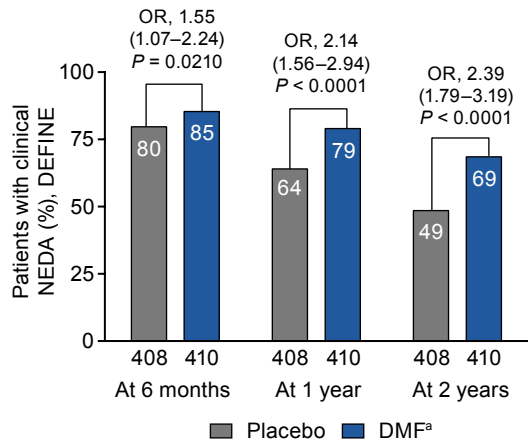**B**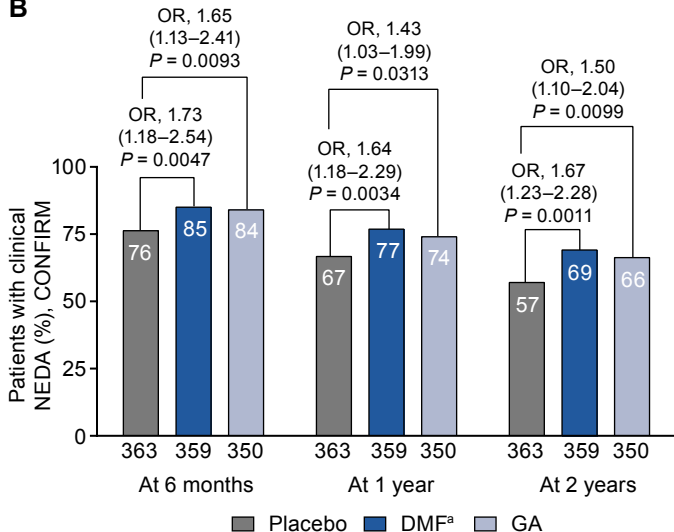**C**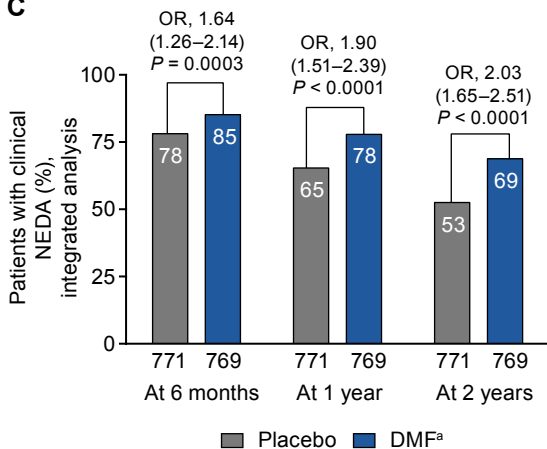

Supplement: ENE-24-726-s001.pdf [file ENE-24-726-s001.pdf]

**A**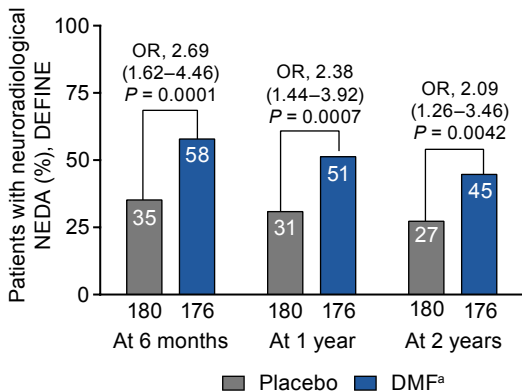**B**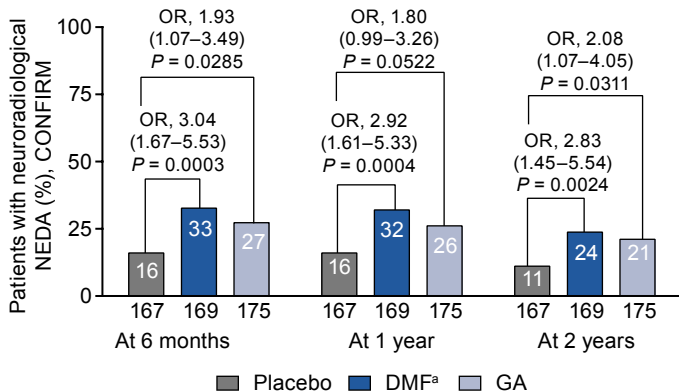**C**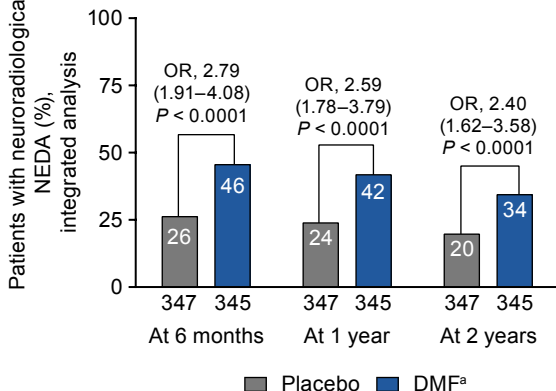

Supplement: ENE-24-726-s002.pdf [file ENE-24-726-s002.pdf]
